# Supplementary material
Source: publisher site journal article supplement (https://www.dovepress.com/article/374767)
Supplement: Supplementary file 1 [file get_supplementary_file.php]

**Supplementary Table 1b** DR datase

| Abbreviation | Description | Range |
| --- | --- | --- |
| Age | Age (y) | 14.0–84.0 |
| DC | Diabetes course (y) | 0.003–30.00 |
| BMI | Body mass index (kg/m2) | 15.40–38.15 |
| HbA1c | Glycosylated hemoglobin (%) | 4.80–17.00 |
| CR | Serum creatinine (umol/L) | 23.50–658.80 |
| UA | Uric acid (umol/L) | 93.10–863.70 |
| ALB | Albumin (g/L) | 14.50–55.90 |
| TCH | Total cholesterol (mmol/L) | 1.27–47.80 |
| TG | Triglyceride (mmol/L) | 0.35–46.00 |
| Ca2+ | Serum calcium concentration (mmol/L) | 1.23–3.27 |
| BUN | Blood Urea nitrogen (mmol/L) | 1.84–28.25 |
| ALT | Alanine aminotransferase (u/L) | 3.00–718.00 |
| GLU | Fasting blood glucose (mmol/L) | 1.49–40.36 |
| GLB | Globulin (g/L) | 9.60–48.80 |
| AST | Aspartate aminotransferase (u/L) | 6.00–229.00 |
| LDL | Low density lipoprotein (mmol/L) | 0.39–7.13 |
| K+ | Serum potassium concentration (mmol/L) | 2.47–5.67 |
| TBIL | Total bilirubin (umol/L) | 3.54–39.51 |
| HDL | High density lipoprotein (mmol/L) | 0.36–4.49 |
| DBIL | Direct bilirubin (umol/L) | 0.40–13.65 |
| Na+ | Serum sodium concentration (mmol/L) | 124.70–160.40 |
| IBIL | Indirect bilirubin (umol/L) | 2.21–28.74 |
| Cl- | Serum chloride concentration (mmol/L) | 90.00–126.00 |
| SG | Specific gravity of urine | 1.001–1.03 |
| PH | Urine pH | 5.00–7.50 |
| HB | Hemoglobin concentration (g/L) | 51.00–186.00 |
| HCT | Hematocrit (%) | 17.00–58.00 |
| WBC | White blood cell count (109/L) | 2.10–17.30 |
| RDW-CV | Red blood cell distribution width | 11.00–42.70 |
| PLT | Platelet count (109/L) | 33.00–499.00 |
| PCT | Platelet hematocrit (ng/ml) | 0.06–0.67 |
| MCV | Mean red blood cell volume (fl) | 58.50–143.00 |
| MPV | Mean platelet volume (fl) | 7.90–17.70 |
| C-P (Fasting) | Fasting C-peptide (ng/ml) | 0.01–12.80 |
| C-P (1 h after meal) | C peptide 1 h after meal (ng/ml) | 0.01–11.77 |
| Sex | Sex | Female = 2, male = 1 |
| UP | Urine protein | Yes = 2, no = 1 |
| DR | Diabetic retinopathy | Yes = 2 (377), no = 1(716) |
